# Supplementary material
Source: PubMed Central journal article supplement (PMC3332053)
Supplement: NIHMS365446-supplement-001.pdf [file NIHMS365446-supplement-001.pdf]

# A Study of Silica Speciation and Condensation Mechanisms. Supporting Information.

David J. Belton, Olivier Deschaume, Siddharth V. Patwardhan, and Carole C. Perry\*

*School of Biomedical and Natural Sciences, Clifton Lane, Nottingham NG11 8NS, United Kingdom*

E-mail: carole.perry@ntu.ac.uk

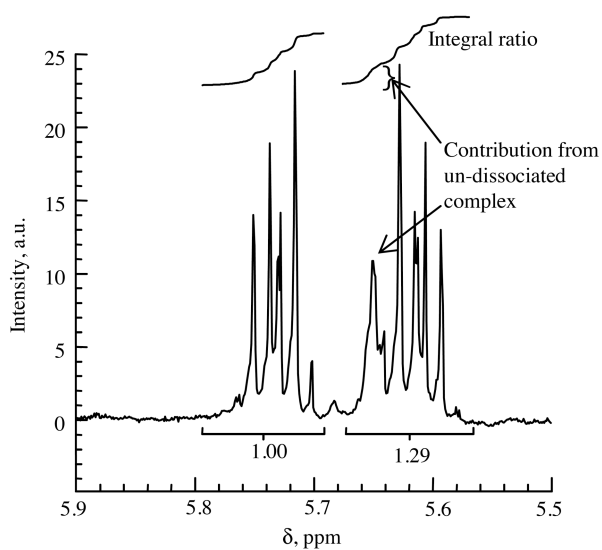

Figure S 1: Typical spectrum of base quenched dipotassium tris(1,2-benzenediolato-O,O')silicate·2H<sub>2</sub>O dissociation.

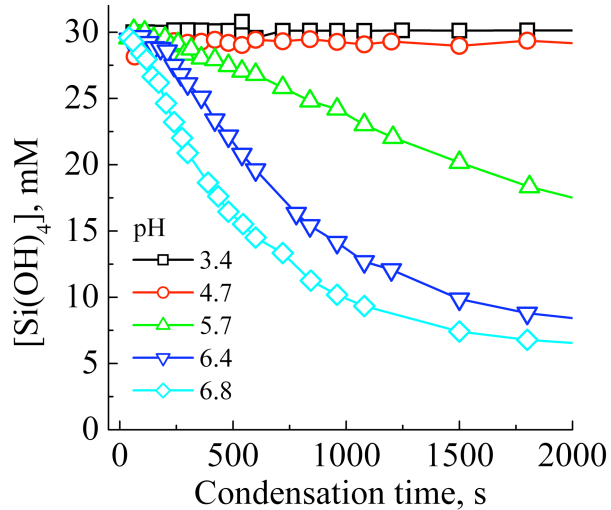

Figure S 2: Typical molybdenum blue measured condensation profiles showing reduction in molybdenum active species at different pHs.

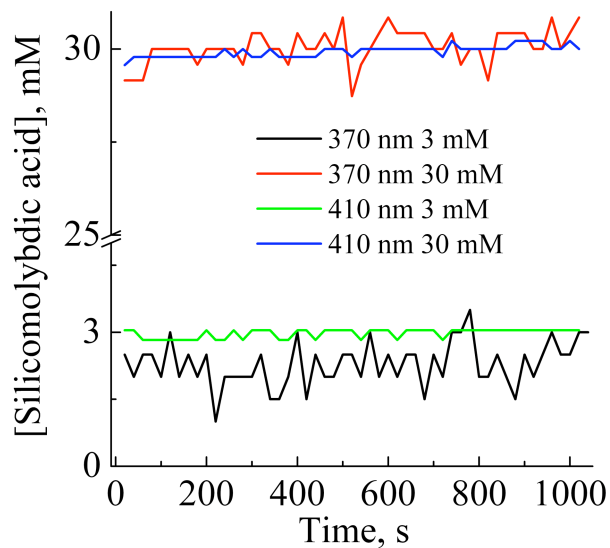

Figure S 3: Comparison of S:N ratio for 3 and 30mM orthosilicic acid solutions measured at 370 and 410nm.
